# Supplementary material for: Sorption capacity of seaweed-like sodium titanate mats for Co2+ removal
Source: PubMed Central journal article supplement (PMC9057711; doi:10.1039/d0ra06662a), 2020-11-11
Supplement: RA-010-D0RA06662A-s001.pdf [file RA-010-D0RA06662A-s001.pdf]

## Electronic Supplementary Information

### **Sorption capacity of seaweed-like sodium titanate mats for $\text{Co}^{2+}$ removal**

Yoshifumi Kondo,<sup>ab</sup> Tomoyo Goto,<sup>\*a</sup> and Tohru Sekino<sup>\*a</sup>

<sup>a</sup> The Institute of Scientific and Industrial Research (ISIR), Osaka University, 8-1 Mihogaoka, Ibaraki, Osaka 567-0047, Japan

<sup>b</sup> Division of Materials and Manufacturing Science, Graduate School of Engineering, Osaka University, 2-1 Yamadaoka, Suita, Osaka 565-0871, Japan

## Table of contents

|                     | Pages           |
|---------------------|-----------------|
| <b>Fig. S1 – S9</b> | <b>S3 – S11</b> |
| <b>Table S1</b>     | <b>S12</b>      |

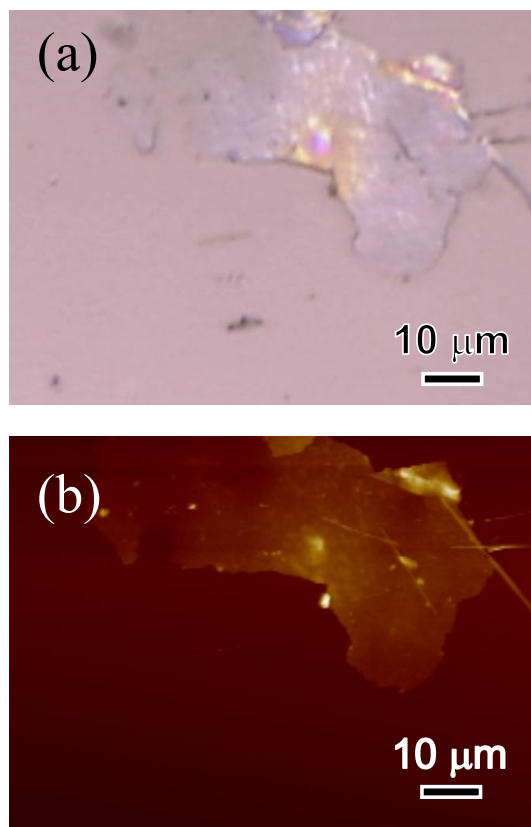

**Fig. S1.** (a) Optical microscope image and (b) AFM image of SST sample.

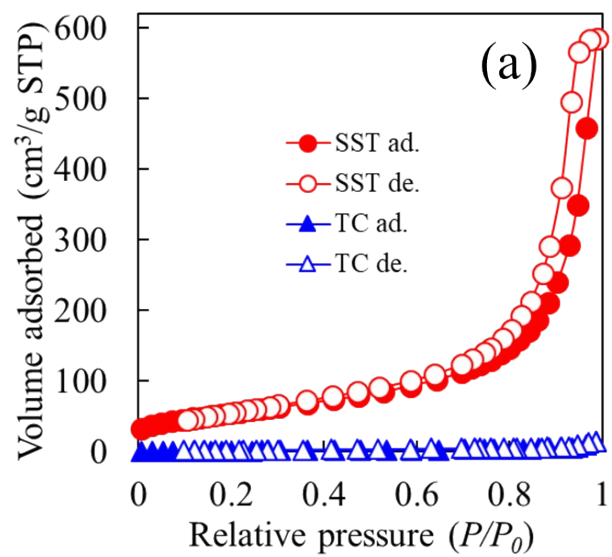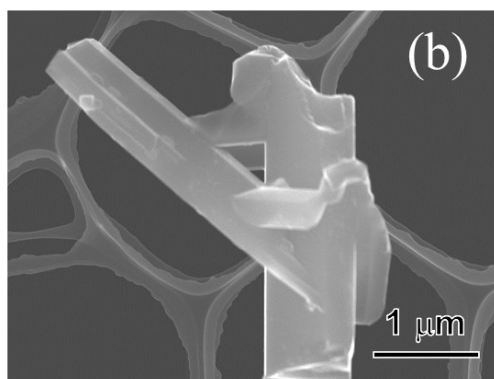

**Fig. S2.** (a)  $\text{N}_2$  adsorption-desorption isotherms of SST and TC samples and (b) SEM image of TC sample.

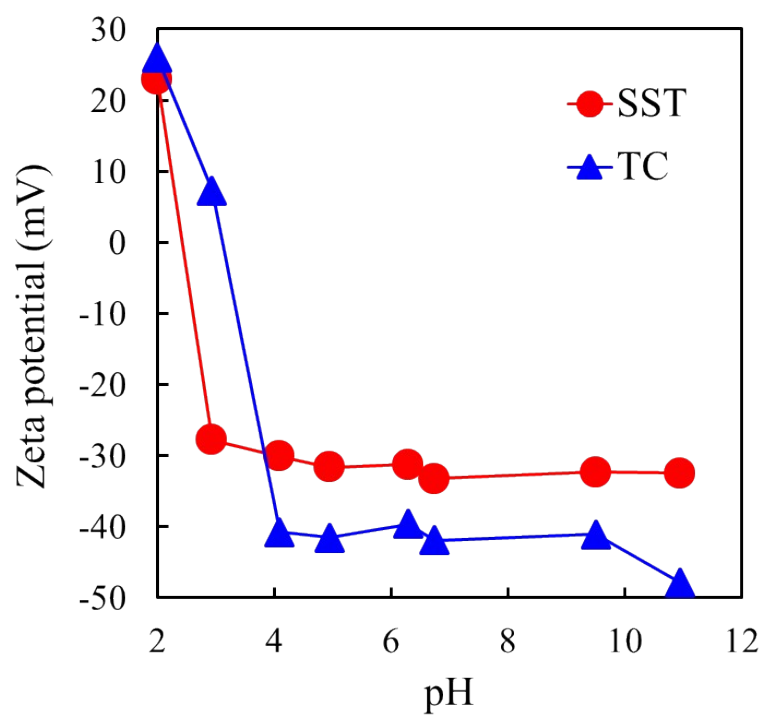

**Fig. S3.** Zeta potential against the solution pH of SST and TC samples at 25 °C.

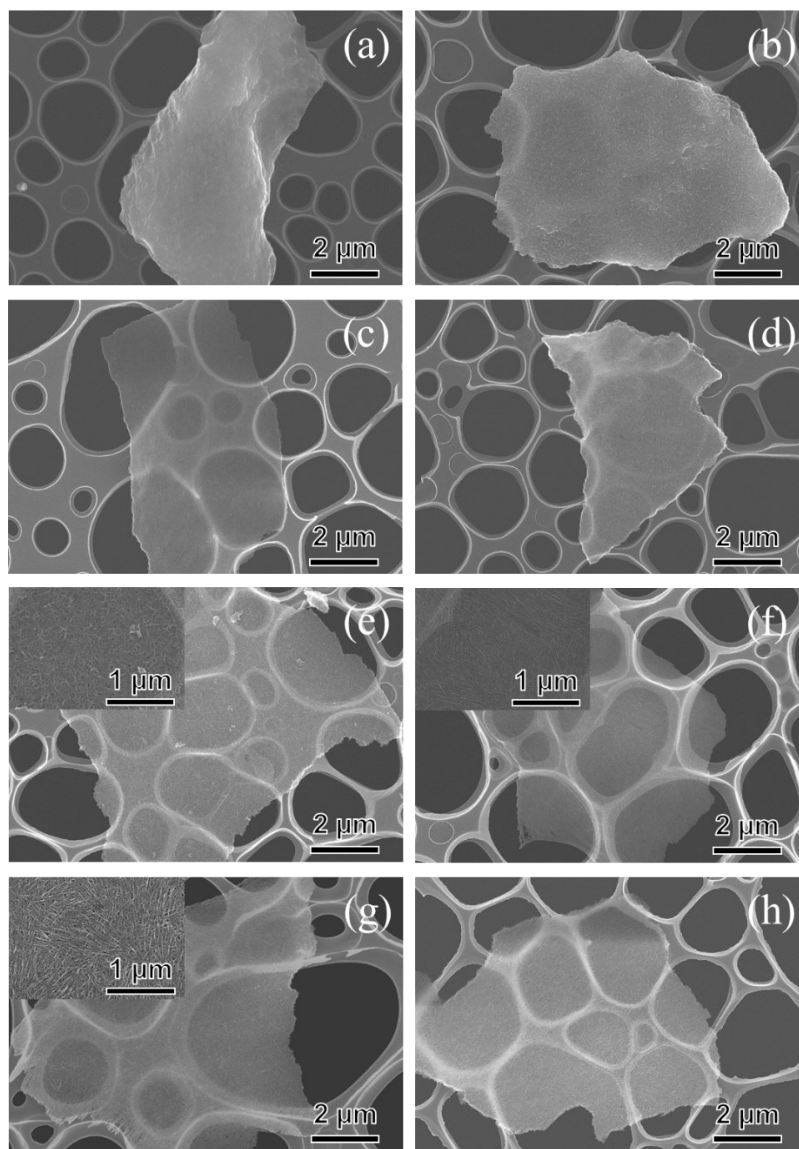

**Fig. S4.** SEM images of (a) SST\_0, (b) SST\_1, (c) SST\_2, (d) SST\_3, (e) SST\_6, (f) SST\_12, (g) SST\_24, and (h) SST samples.

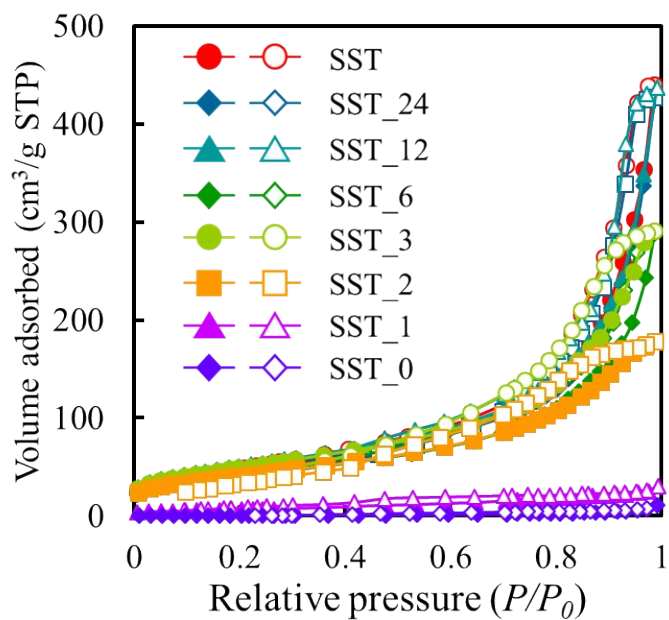

**Fig. S5.** N<sub>2</sub> adsorption-desorption isotherms of SST\_X samples.

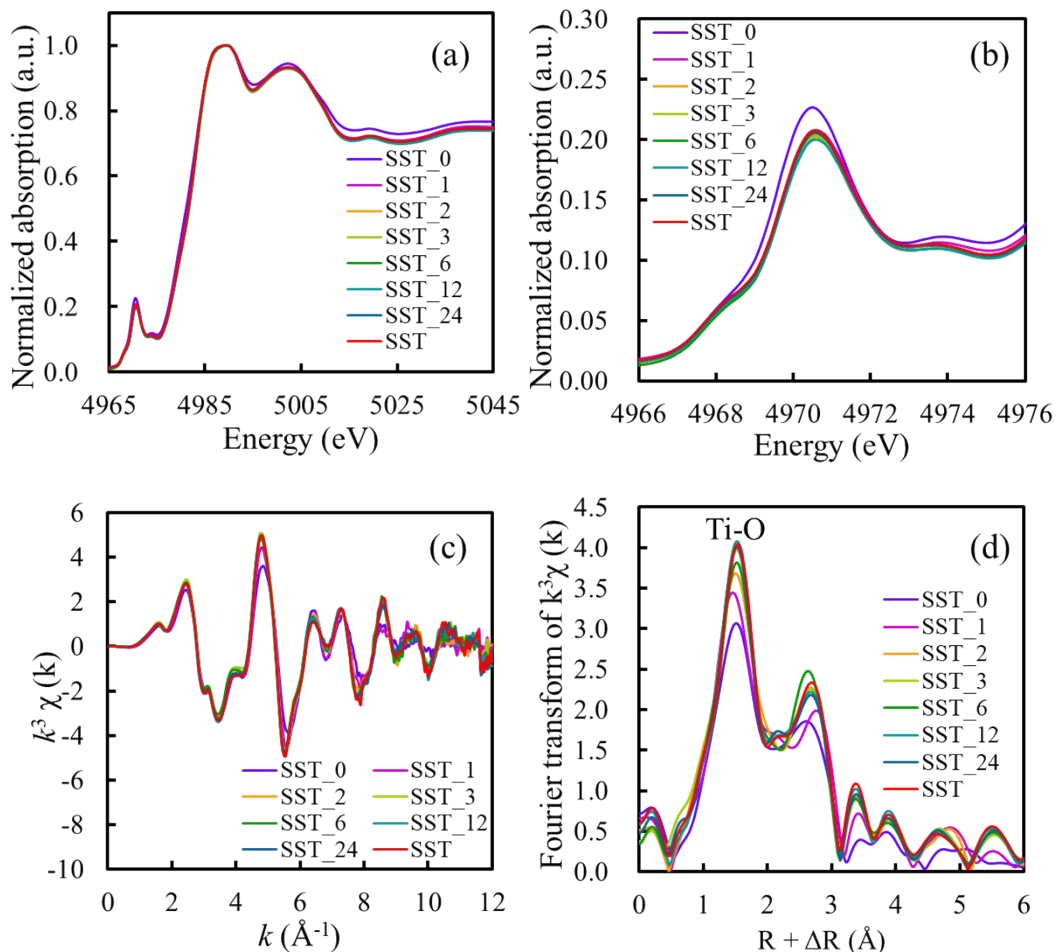

**Fig. S6.** Ti K-edge (a) XANES spectra, (b) pre-edge peaks, (c) EXAFS spectra, and (d) FT-EXAFS spectra of SST\_X samples. Radial distribution functions were not corrected for phase shift.



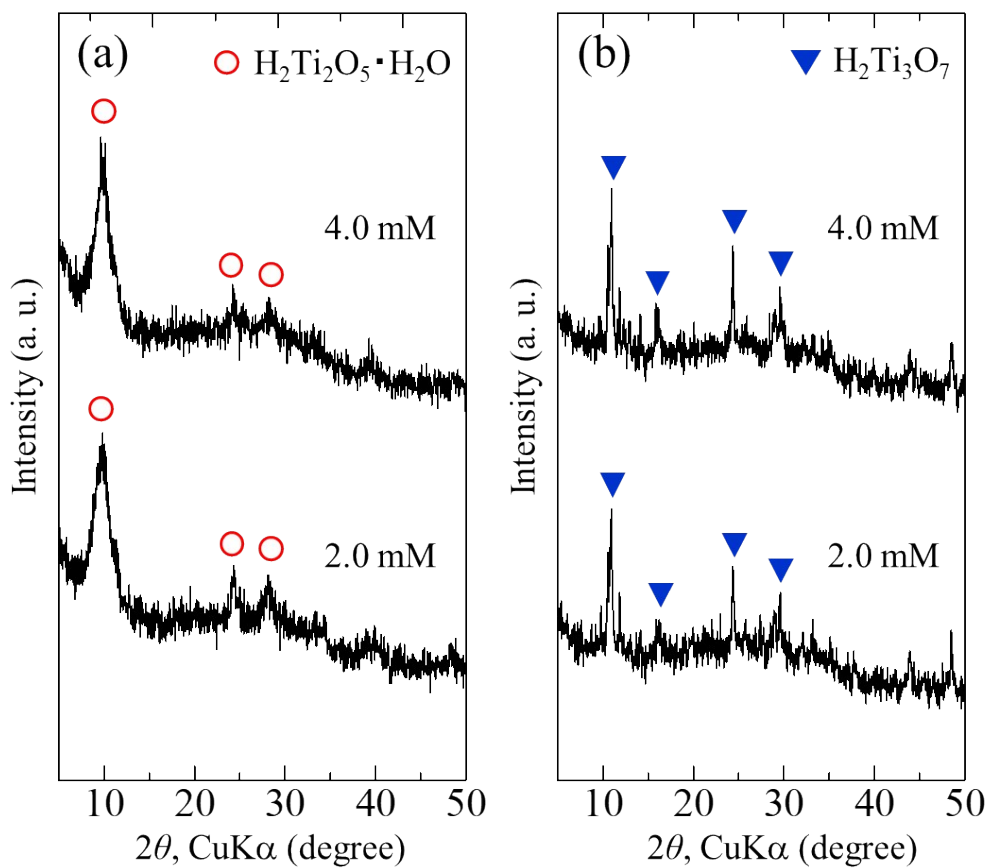

**Fig. S7.** XRD patterns of (a) SST and (b) TC samples after  $\text{Co}^{2+}$  sorption testing 2.0 mM and 4.0 mM cobalt nitrate.

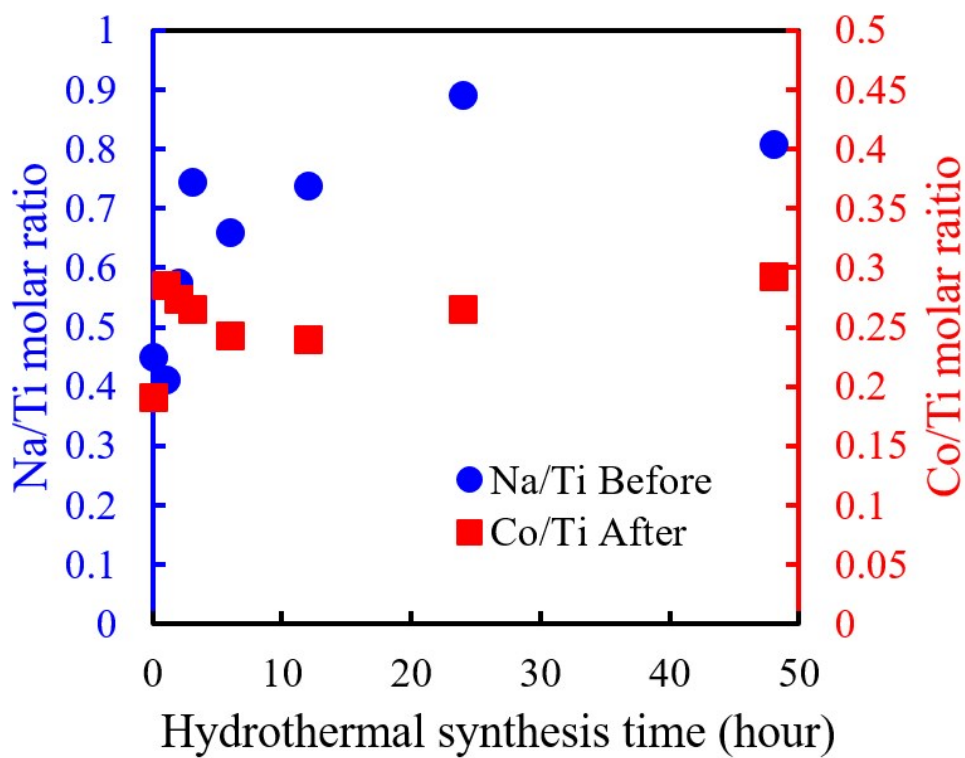

**Fig. S8.** Changes in Na/Ti molar ratio of SST\_X samples before  $\text{Co}^{2+}$  sorption tests and Co/Ti molar ratio of SST\_X samples after the tests.

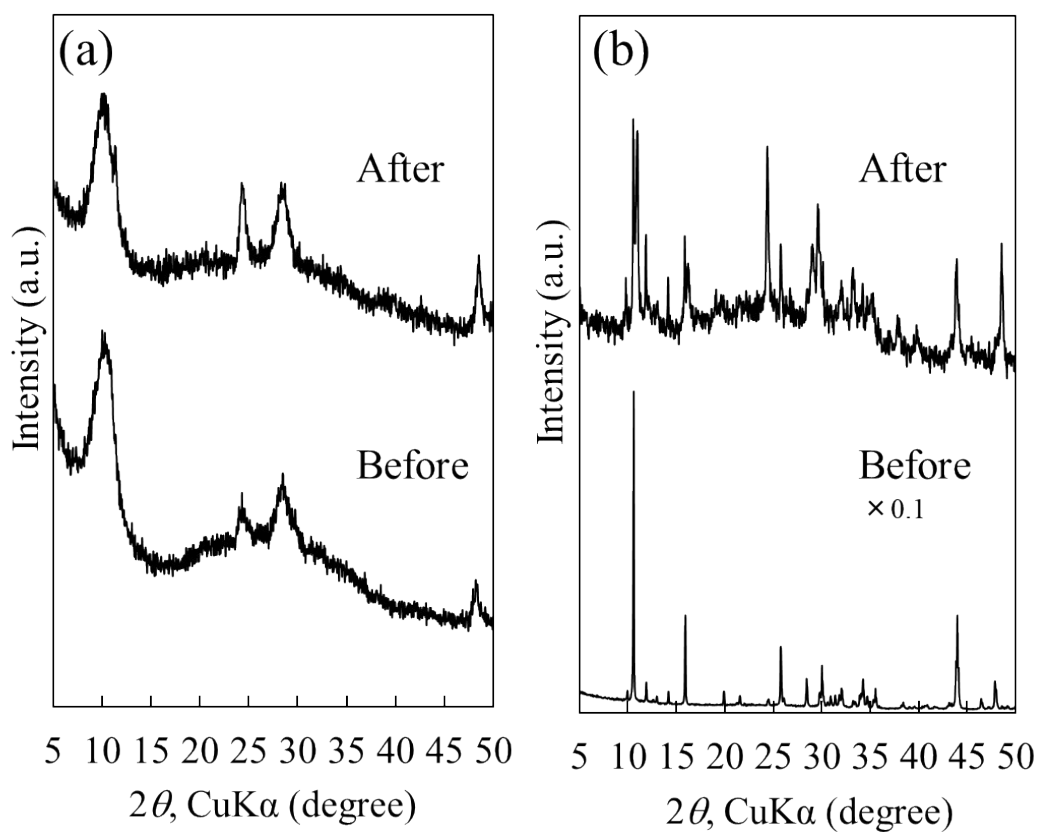

**Fig. S9.** XRD patterns of (a) SST and (b) TC samples after the sorption test of four-element coexistence ( $\text{Co}^{2+}$ ,  $\text{Ca}^{2+}$ ,  $\text{Mg}^{2+}$ , and  $\text{Na}^+$ ).

**Table S1.** BET specific surface area of SST\_X samples.

| Sample | BET specific surface area [m <sup>2</sup> /g] |
|--------|-----------------------------------------------|
| SST_0  | 2.222                                         |
| SST_1  | 25.23                                         |
| SST_2  | 148.3                                         |
| SST_3  | 178.8                                         |
| SST_6  | 146.3                                         |
| SST_12 | 184.2                                         |
| SST_24 | 173.4                                         |
| SST    | 158.3                                         |
